# Supplementary material for: A hydrolytically stable complexant for minor An separation from Ln in process relevant diluents
Source: Royal Society of Chemistry journal article supplement (doi:10.1039/d4cc00983e), 2024-01-01
Supplement: d4cc00983e1.pdf [file d4cc00983e1.pdf]

# A Hydrolytically Stable Complexant for Minor An Separation from Ln in Process Relevant Diluents

## Supporting Information

Lesta S. Fletcher, Mariah L. Tedder, Samiat O. Olayiwola, and Jesse D. Carrick\*

Department of Chemistry, Tennessee Technological University, Cookeville, TN 38505-0001, United States

Corresponding Author Email: [jcarrick@tntech.edu](mailto:jcarrick@tntech.edu)

|                                                                                                                                                                                          |            |
|------------------------------------------------------------------------------------------------------------------------------------------------------------------------------------------|------------|
| <b><u>Table of Contents</u></b>                                                                                                                                                          | <b>S1</b>  |
| <b>Experimental Procedures</b>                                                                                                                                                           | <b>S2</b>  |
| <b>Statistical Equations</b>                                                                                                                                                             | <b>S3</b>  |
| <b>Table S1.</b> Raw Data to Accompany <b>Figure 1(a)</b> . $^{241}\text{Am}^{3+}$ Distribution ( $D$ )-values, at 1M $\text{HNO}_{3(\text{aq})}$ as $f(t)$ in Exxal-8/kerosene          | <b>S4</b>  |
| <b>Table S2.</b> Raw Data to Accompany <b>Figure 1(a)</b> . $^{154}\text{Eu}^{3+}$ Distribution ( $D$ )-values, at 1M $\text{HNO}_{3(\text{aq})}$ as $f(t)$ in Exxal-8/kerosene          | <b>S5</b>  |
| <b>Table S3.</b> Summary $D_M$ for <b>Tables S1</b> and <b>S2</b>                                                                                                                        | <b>S6</b>  |
| <b>Table S4.</b> Raw Data to Accompany <b>Figure 1(b)</b> . $^{241}\text{Am}^{3+}$ Distribution ( $D$ )-values, $f(\text{HNO}_{3(\text{aq})})$ Initial Concentration in Exxal-8/kerosene | <b>S7</b>  |
| <b>Table S5.</b> Raw Data to Accompany <b>Figure 1(b)</b> . $^{154}\text{Eu}^{3+}$ Distribution ( $D$ )-values, $f(\text{HNO}_{3(\text{aq})})$ Initial Concentration in Exxal-8/kerosene | <b>S9</b>  |
| <b>Table S6.</b> Summary $D_M$ for <b>Tables S4</b> and <b>S5</b>                                                                                                                        | <b>S11</b> |
| <b>Table S7.</b> Raw Data to Accompany <b>Figure 2(a)</b> . $^{241}\text{Am}^{3+}$ Distribution ( $D$ )-values, $f([\text{L}])$ Initial Concentration in Exxal-8/kerosene                | <b>S12</b> |
| <b>Table S8.</b> Raw Data to Accompany <b>Figure 2(a)</b> . $^{154}\text{Eu}^{3+}$ Distribution ( $D$ )-values, $f([\text{L}])$ Initial Concentration in Exxal-8/kerosene                | <b>S13</b> |
| <b>Table S9.</b> Summary $D_M$ for <b>Tables S7</b> and <b>S8</b>                                                                                                                        | <b>S14</b> |

## Experimental Section

**Chemicals.** All reagents were purchased from U.S. chemical suppliers, stored according to published protocols, and used as received unless indicated otherwise. All aqueous solutions were prepared with Milli-Q type 1 water system.

**Small-Scale Dissolution.** A small amount of mass, generally between 10 and 20 mg, was accurately weighed out into a sample tube. Ten microliters of the appropriate diluent (Exxal-8 or kerosene) were added to the sample vial and sonicated for five to thirty minutes. This step was repeated until complete dissolution of the complexant was observed. The sample was capped, parafilm, and left for 24 hours to ensure the complexant did not crash out of solution.

**Solvent Extraction.** Organic phase. An appropriate mass of **1** was transferred from a sample vial to a 5.0 mL Class A volumetric flask to make a concentrated stock solution. Weighing by difference was used on the original sample vial to calculate the actual mass of **1** dissolved. The solvent was added to the flask and manually agitated to facilitate dissolution. Generally, the complexant was fully dissolved after 5 minutes of sonication. Various concentrations of **1** were prepared from the concentrated stock solution in 1.0 or 2.0 mL Class A volumetric glassware.

**Aqueous phase.** Eight concentrated stock solutions of  $^{241}\text{Am}^{3+}$  were prepared in various concentrations of  $\text{HNO}_3$  (0.25–5.0 M). These  $^{241}\text{Am}^{3+}$  stock solutions were used throughout the entirety of this study to spike the working aqueous phase of the matching  $[\text{HNO}_3]$ . Initial counts of the aqueous phase were generally 3400–4000 cpm / 200  $\mu\text{L}$ . This method was repeated for  $^{154}\text{Eu}^{3+}$ . **Extraction.** Equal volumes (0.6 mL) of the organic and active aqueous phase, in that order, were added to a 1.5 mL microcentrifuge tube. The centrifuge tubes were capped and wrapped in parafilm then placed on a pulsing vortex shaker at 1700 rpm for the appropriate time. After the allotted time on the vortex shaker, the samples were centrifuged for five minutes to achieve phase separation. The organic and aqueous phases were transferred to separate 1.5 mL centrifuge tubes with a disposable fine-tip transfer pipette. A 200  $\mu\text{L}$  aliquot of each phase was transferred to a counting tube with sampling performed in duplicate. **Gamma Spectroscopy.** A 2480 Wizard<sup>2</sup> automatic gamma counter with 3 inch NaI(Tl) was used for the determination of  $^{241}\text{Am}^{3+}$  and  $^{154}\text{Eu}^{3+}$  activity of samples. Samples were counted for 10 minutes, or until total counts reached 10000, and the instrument software relayed the results as counts per minute (CPM). The distribution ratios of a given metal ion ( $D_M$ ) were calculated according to Equation 1 where  $[M]$  is the net CPM of either the organic phase (numerator) or aqueous phase (denominator). Separation factors (SF) were calculated using Equation 2. Values are reported in figures as an average of duplicate samples with error bars representing uncertainties calculated at  $2\sigma$  from the counting error. The supporting information for this work provides additional detail.

$$D_M = \frac{[M]_{org}}{[M]_{aq}} \quad \text{Equation (1)}$$

$$SF_{Am(III)/Eu(III)} = \frac{D_{Am(III)}}{D_{Eu(III)}} \quad \text{Equation (2)}$$

**UV-vis Titration.** UV-visible spectrophotometric titrations were performed in a 3 mL, 1.00 cm path length quartz cuvette, using a Cary 5000 UV-vis spectrophotometer. For each titration, an appropriate volume of a  $1.5 \times 10^{-3}$  M  $\text{Ln}(\text{NO}_3)_3$  ( $\text{Ln} = \text{Nd}, \text{Eu}$ ) solution in 99% acetonitrile/1% water (v/v) was added to 2.0 mL of a  $1.5 \times 10^{-5}$  M solution of **1** in the same solvent system. The

total volume of  $\text{Ln}(\text{NO}_3)_3$  added was 60  $\mu\text{L}$ . A wavelength scan from 225 to 450 nm at a scan rate of 100 nm per minute and a 5 data point average was taken of the free (uncomplexed) complexant and after each titration. The sample was manually agitated for three minutes after each titration to ensure complete complexation. The titration was complete when the variation in absorbance became negligible. Raw spectra were baseline corrected with OriginPro software and imported into HypSpec software for determination of stability constants by nonlinear regression curve fitting.

### Counting Statistics

A critical limit ( $L_C$ , Equation S1) was calculated for every counting (solvent extraction) experiment (Tables S1, S2, S4, S5, S7, and S8) to determine if the net count was statistically significant at the 95% confidence level.

$$L_C = 1.645\sqrt{2B} \quad \text{Equation S1}$$

When a net CPM was found to be below the calculated  $L_C$  a footnote was added to the data table (Tables S5 and S8) to indicate that the activity is not detected and an upper limit ( $L_U$ , Equation S2) at the 95% confidence is reported. The calculated values were left in the raw data tables with a footnote, but these values were not used to report a distribution value in the associated summary table (Tables S6 and S9) or figure (Figure 2).

$$L_U = \text{cpm}_{\text{net}} + 1.645\sqrt{(\text{cpm}_{\text{net}} + 2B)} \quad \text{Equation S2}$$

The uncertainty for each distribution value ( $D_M$ , where  $M = {}^{241}\text{Am}^{3+}$  or  ${}^{154}\text{Eu}^{3+}$ ) was calculated from the counting error ( $2\sigma$ ) according to Equation S3:

$$\sigma_{D_M} = D_M \times \sqrt{\left(\frac{\left(\sqrt{\sigma_{\text{org}}^2 + \sigma_{\text{blank}}^2}\right)^2}{\text{Net cpm}_{\text{org}}}\right)^2 + \left(\frac{\left(\sqrt{\sigma_{\text{aq}}^2 + \sigma_{\text{blank}}^2}\right)^2}{\text{Net cpm}_{\text{aq}}}\right)^2} \quad \text{Equation S3}$$

The uncertainty for the average  $D_M$  was calculated according to Equation S4 and reported in the summary tables (Tables S3, S6, and S9).

$$\sigma_{\text{Avg}(D_M)} = \frac{\sqrt{\sigma_{D_1}^2 + \sigma_{D_2}^2}}{2} \quad \text{Equation S4}$$

$D_1$  and  $D_2$  refer to the individual  $D_M$  values from duplicate samples taken for each data point.

**Table S1. Raw Data to Accompany Figure 1(a).  $^{241}\text{Am}^{3+}$  Distribution ( $D$ )-values, at 1M  $\text{HNO}_{3(\text{aq})}$  as  $f(t)$  in Kerosene/Exxal (50v/50v)**

| <b>Time (min.)</b> | <b>Sample ID</b>    | <b>CPM</b> | <b>Error (%)</b> | <b>Net CPM</b> | <b>Recovery (%)</b> | <b><math>D_{Am}</math> (org./aq.)</b> | <b><math>D_{Am}</math> Avg.</b> |
|--------------------|---------------------|------------|------------------|----------------|---------------------|---------------------------------------|---------------------------------|
| <b>5</b>           | org. - 1            | 502        | 1.28             | 481            | 101.0               | 0.1553                                | 0.1542                          |
|                    | org. - 2            | 491        | 1.26             | 470            | 99.8                | 0.1532                                |                                 |
|                    | aq. - 3             | 3119       | 1.00             | 3098           |                     |                                       |                                 |
|                    | aq. - 4             | 3089       | 1.00             | 3068           |                     |                                       |                                 |
| <b>10</b>          | org. - 5            | 863        | 1.00             | 842            | 100.6               | 0.3089                                | 0.3309                          |
|                    | org. - 6            | 933        | 1.00             | 912            | 98.6                | 0.3529                                |                                 |
|                    | aq. - 7             | 2747       | 1.00             | 2726           |                     |                                       |                                 |
|                    | aq. - 8             | 2605       | 1.00             | 2584           |                     |                                       |                                 |
| <b>20</b>          | org. - 9            | 1509       | 1.00             | 1488           | 98.1                | 0.7485                                | 0.7627                          |
|                    | org.- 10            | 1560       | 1.00             | 1539           | 99.3                | 0.7769                                |                                 |
|                    | aq. - 11            | 2009       | 1.00             | 1988           |                     |                                       |                                 |
|                    | aq. - 12            | 2002       | 1.00             | 1981           |                     |                                       |                                 |
| <b>30</b>          | org. -13            | 1813       | 1.00             | 1792           | 96.0                | 1.112                                 | 1.134                           |
|                    | org. -14            | 1911       | 1.00             | 1890           | 99.4                | 1.156                                 |                                 |
|                    | aq. - 15            | 1633       | 1.00             | 1612           |                     |                                       |                                 |
|                    | aq. - 16            | 1656       | 1.00             | 1635           |                     |                                       |                                 |
| <b>45</b>          | org. -17            | 2128       | 1.00             | 2107           | 97.5                | 1.563                                 | 1.590                           |
|                    | org. -18            | 2206       | 1.00             | 2185           | 99.8                | 1.616                                 |                                 |
|                    | aq. - 19            | 1369       | 1.00             | 1348           |                     |                                       |                                 |
|                    | aq. - 20            | 1373       | 1.00             | 1352           |                     |                                       |                                 |
| <b>60</b>          | org. -21            | 2337       | 1.00             | 2316           | 98.1                | 1.995                                 | 2.024                           |
|                    | org.-22             | 2403       | 1.00             | 2382           | 99.9                | 2.053                                 |                                 |
|                    | aq. - 23            | 1182       | 1.00             | 1161           |                     |                                       |                                 |
|                    | aq. - 24            | 1181       | 1.00             | 1160           |                     |                                       |                                 |
| <b>90</b>          | org. -25            | 2341       | 1.00             | 2320           | 97.5                | 2.042                                 | 2.030                           |
|                    | org. -26            | 2357       | 1.00             | 2336           | 98.6                | 2.017                                 |                                 |
|                    | aq. - 27            | 1157       | 1.00             | 1136           |                     |                                       |                                 |
|                    | aq. - 28            | 1179       | 1.00             | 1158           |                     |                                       |                                 |
| <b>120</b>         | org. -29            | 2345       | 1.00             | 2324           | 97.0                | 2.084                                 | 2.104                           |
|                    | org. -30            | 2470       | 1.00             | 2449           | 101.6               | 2.124                                 |                                 |
|                    | aq. - 31            | 1136       | 1.00             | 1115           |                     |                                       |                                 |
|                    | aq. - 32            | 1174       | 1.00             | 1153           |                     |                                       |                                 |
| A <sub>0</sub>     | A <sub>0</sub> - 33 | 3565       | 1.00             | 3544           |                     |                                       |                                 |
| A <sub>0</sub>     | A <sub>0</sub> - 34 | 3567       | 1.00             | 3546           |                     |                                       |                                 |
| A <sub>0</sub>     | Avg.                | 3566       | 1.00             | 3545           |                     |                                       |                                 |
| Blank              | Avg.                | 21         | 6.87             |                |                     |                                       |                                 |

**Table S2. Raw Data to Accompany Figure 1(a).  $^{152}\text{Eu}^{3+}$  Distribution ( $D$ )-values, at 1M  $\text{HNO}_{3(\text{aq})}$  as  $f(t)$  in Kerosene/Exxal (50v/50v)**

| <b>Time<br/>(min.)</b> | <b>Sample<br/>ID</b> | <b>CPM</b> | <b>Error<br/>(%)</b> | <b>Net<br/>CPM</b> | <b>Recovery<br/>(%)</b> | <b><math>D_{Eu}</math><br/>(org./aq.)</b> | <b><math>D_{Eu}</math><br/>(Avg.)</b> |
|------------------------|----------------------|------------|----------------------|--------------------|-------------------------|-------------------------------------------|---------------------------------------|
| <b>5</b>               | org. - 1             | 197        | 2.22                 | 46                 | 101.7                   | 0.0125                                    | 0.0128                                |
|                        | org. - 2             | 199        | 2.22                 | 48                 | 100.5                   | 0.0132                                    |                                       |
|                        | aq. - 3              | 3838       | 1.00                 | 3687               |                         |                                           |                                       |
|                        | aq. - 4              | 3794       | 1.00                 | 3643               |                         |                                           |                                       |
| <b>10</b>              | org. - 5             | 199        | 2.29                 | 48                 | 99.2                    | 0.0134                                    | 0.0127                                |
|                        | org. - 6             | 195        | 2.22                 | 44                 | 100.4                   | 0.0121                                    |                                       |
|                        | aq. - 7              | 3746       | 0.99                 | 3595               |                         |                                           |                                       |
|                        | aq. - 8              | 3794       | 1.00                 | 3643               |                         |                                           |                                       |
| <b>20</b>              | org. - 9             | 200        | 2.26                 | 49                 | 100.6                   | 0.0134                                    | 0.0126                                |
|                        | org. -10             | 194        | 2.24                 | 43                 | 100.5                   | 0.0118                                    |                                       |
|                        | aq. - 11             | 3795       | 1.00                 | 3644               |                         |                                           |                                       |
|                        | aq. - 12             | 3799       | 1.00                 | 3648               |                         |                                           |                                       |
| <b>30</b>              | org. -13             | 195        | 2.26                 | 44                 | 100.6                   | 0.0121                                    | 0.0131                                |
|                        | org. -14             | 202        | 2.28                 | 51                 | 99.5                    | 0.0142                                    |                                       |
|                        | aq. - 15             | 3801       | 1.00                 | 3650               |                         |                                           |                                       |
|                        | aq. - 16             | 3752       | 1.00                 | 3601               |                         |                                           |                                       |
| <b>45</b>              | org. -17             | 207        | 2.25                 | 56                 | 98.4                    | 0.0157                                    | 0.0136                                |
|                        | org. -18             | 193        | 2.28                 | 42                 | 100.4                   | 0.0115                                    |                                       |
|                        | aq. - 19             | 3707       | 1.00                 | 3556               |                         |                                           |                                       |
|                        | aq. - 20             | 3796       | 1.00                 | 3645               |                         |                                           |                                       |
| <b>60</b>              | org. -21             | 200        | 2.26                 | 49                 | 98.8                    | 0.0137                                    | 0.0138                                |
|                        | org-22               | 201        | 2.27                 | 50                 | 99.0                    | 0.0139                                    |                                       |
|                        | aq. - 23             | 3730       | 1.00                 | 3579               |                         |                                           |                                       |
|                        | aq. - 24             | 3738       | 1.00                 | 3587               |                         |                                           |                                       |
| <b>90</b>              | org. -25             | 193        | 2.26                 | 42                 | 98.3                    | 0.0118                                    | 0.0125                                |
|                        | org. -26             | 200        | 2.28                 | 49                 | 102.6                   | 0.0132                                    |                                       |
|                        | aq. - 27             | 3720       | 1.00                 | 3569               |                         |                                           |                                       |
|                        | aq. - 28             | 3869       | 1.00                 | 3718               |                         |                                           |                                       |
| <b>120</b>             | org. -25             | 202        | 2.25                 | 51                 | 98.7                    | 0.0143                                    | 0.0141                                |
|                        | org. -26             | 202        | 2.34                 | 51                 | 100.5                   | 0.0140                                    |                                       |
|                        | aq. - 27             | 3723       | 1.00                 | 3572               |                         |                                           |                                       |
|                        | aq. - 28             | 3792       | 1.00                 | 3641               |                         |                                           |                                       |
| A <sub>0</sub>         | A <sub>0</sub> - 33  | 3876       | 1.00                 | 3725               |                         |                                           |                                       |
| A <sub>0</sub>         | A <sub>0</sub> - 34  | 3770       | 1.00                 | 3619               |                         |                                           |                                       |
| A <sub>0</sub>         | Avg.                 | 3823       | 1.00                 | 3672               |                         |                                           |                                       |
| Blank                  | Avg.                 | 151        | 2.61                 |                    |                         |                                           |                                       |

**Table S3. Summary  $D_M$  for Tables S1 and S2**

| <b>Time<br/>(min)</b> | <b><math>D_{Am}</math><br/>Avg.</b> | <b><math>D_{Am}</math><br/>Uncertainty<br/>(<math>2\sigma</math>)</b> | <b><math>D_{Eu}</math><br/>Avg.</b> | <b><math>D_{Eu}</math><br/>Uncertainty<br/>(<math>2\sigma</math>)</b> | <b><math>SF</math> (Avg.)<br/>(<math>D_{Am} / D_{Eu}</math>)</b> | <b><math>SF</math><br/>Uncertainty<br/>(<math>2\sigma</math>)</b> |
|-----------------------|-------------------------------------|-----------------------------------------------------------------------|-------------------------------------|-----------------------------------------------------------------------|------------------------------------------------------------------|-------------------------------------------------------------------|
| <b>5</b>              | 0.1542                              | 0.004                                                                 | 0.0128                              | 0.002                                                                 | 12.0                                                             | 2.2                                                               |
| <b>10</b>             | 0.3309                              | 0.007                                                                 | 0.0127                              | 0.002                                                                 | 26.0                                                             | 4.8                                                               |
| <b>20</b>             | 0.7627                              | 0.015                                                                 | 0.0126                              | 0.002                                                                 | 60.4                                                             | 11.1                                                              |
| <b>30</b>             | 1.134                               | 0.023                                                                 | 0.0131                              | 0.002                                                                 | 86.5                                                             | 15.6                                                              |
| <b>45</b>             | 1.590                               | 0.032                                                                 | 0.0136                              | 0.002                                                                 | 117                                                              | 20.4                                                              |
| <b>60</b>             | 2.024                               | 0.041                                                                 | 0.0138                              | 0.002                                                                 | 147                                                              | 25.4                                                              |
| <b>90</b>             | 2.030                               | 0.041                                                                 | 0.0125                              | 0.002                                                                 | 163                                                              | 30.4                                                              |
| <b>120</b>            | 2.104                               | 0.043                                                                 | 0.0141                              | 0.002                                                                 | 149                                                              | 25.4                                                              |

**Table S4. Raw Data to Accompany Figure 2(b).  $^{241}\text{Am}^{3+}$  Distribution ( $D$ )-values,  $f(\text{HNO}_3(\text{aq}))$  with Initial Concentration in Kerosene/Exxal (50v/50v) of 25 mM**

| [HNO <sub>3</sub> ]<br>(M) | Sample<br>ID        | CPM  | Error<br>(%) | Net<br>CPM | Recovery<br>(%) | $D_{Am}$<br>(org./aq.) | $D_{Am}$<br>Avg. |
|----------------------------|---------------------|------|--------------|------------|-----------------|------------------------|------------------|
| <b>0.25</b>                | org. - 1            | 1175 | 1.00         | 1153       | 100.7           | 0.4358                 | 0.4503           |
|                            | org. - 2            | 1217 | 1.00         | 1195       | 99.9            | 0.4648                 |                  |
|                            | aq. - 3             | 2668 | 1.00         | 2646       |                 |                        |                  |
|                            | aq. - 4             | 2593 | 1.00         | 2571       |                 |                        |                  |
| <b>0.5</b>                 | org. - 5            | 1687 | 1.00         | 1665       | 97.7            | 0.9224                 | 0.9431           |
|                            | org. - 6            | 1775 | 1.00         | 1753       | 100.6           | 0.9637                 |                  |
|                            | aq. - 7             | 1827 | 1.00         | 1805       |                 |                        |                  |
|                            | aq. - 8             | 1841 | 1.00         | 1819       |                 |                        |                  |
| <b>0.75</b>                | org. - 9            | 2399 | 1.00         | 2377       | 101.2           | 1.799                  | 1.850            |
|                            | org. -10            | 2509 | 1.00         | 2487       | 103.9           | 1.901                  |                  |
|                            | aq. - 11            | 1343 | 1.00         | 1321       |                 |                        |                  |
|                            | aq. - 12            | 1330 | 1.00         | 1308       |                 |                        |                  |
| <b>1.0</b>                 | org. -13            | 2877 | 1.00         | 2855       | 98.3            | 2.648                  | 2.695            |
|                            | org. -14            | 3037 | 1.00         | 3015       | 102.8           | 2.741                  |                  |
|                            | aq. - 15            | 1100 | 1.00         | 1078       |                 |                        |                  |
|                            | aq. - 16            | 1122 | 1.00         | 1100       |                 |                        |                  |
| <b>2.0</b>                 | org. -17            | 3118 | 1.00         | 3096       | 97.2            | 10.12                  | 10.25            |
|                            | org. -18            | 3220 | 1.00         | 3198       | 100.1           | 10.38                  |                  |
|                            | aq. - 19            | 328  | 1.75         | 306        |                 |                        |                  |
|                            | aq. - 20            | 330  | 1.74         | 308        |                 |                        |                  |
| <b>3.0</b>                 | org. -21            | 3474 | 1.00         | 3452       | 96.4            | 13.18                  | 13.45            |
|                            | org.-22             | 3673 | 1.00         | 3651       | 101.6           | 13.73                  |                  |
|                            | aq. - 23            | 284  | 1.88         | 262        |                 |                        |                  |
|                            | aq. - 24            | 288  | 1.86         | 266        |                 |                        |                  |
| <b>4.0</b>                 | org. -25            | 2954 | 1.00         | 2932       | 95.0            | 8.778                  | 9.006            |
|                            | org. -26            | 3152 | 1.00         | 3130       | 100.9           | 9.233                  |                  |
|                            | aq. - 27            | 356  | 1.68         | 334        |                 |                        |                  |
|                            | aq. - 28            | 361  | 1.66         | 339        |                 |                        |                  |
| <b>5.0</b>                 | org. -25            | 3055 | 1.00         | 3033       | 97.9            | 9.721                  | 9.699            |
|                            | org. -26            | 3109 | 1.00         | 3087       | 99.7            | 9.677                  |                  |
|                            | aq. - 27            | 334  | 1.73         | 312        |                 |                        |                  |
|                            | aq. - 28            | 341  | 1.71         | 319        |                 |                        |                  |
| <b>0.25</b>                | A <sub>0</sub> - 33 | 3793 | 1.00         | 3771       |                 |                        |                  |
| <b>0.50</b>                | A <sub>0</sub> - 34 | 3572 | 1.00         | 3550       |                 |                        |                  |
| <b>0.75</b>                | A <sub>0</sub> - 35 | 3674 | 1.00         | 3652       |                 |                        |                  |
| <b>1.0</b>                 | A <sub>0</sub> - 36 | 4024 | 1.00         | 4002       |                 |                        |                  |
| <b>2.0</b>                 | A <sub>0</sub> - 37 | 3523 | 1.00         | 3501       |                 |                        |                  |
| <b>3.0</b>                 | A <sub>0</sub> - 38 | 3875 | 1.00         | 3853       |                 |                        |                  |
| <b>4.0</b>                 | A <sub>0</sub> - 39 | 3460 | 1.00         | 3438       |                 |                        |                  |

|            |            |      |      |      |
|------------|------------|------|------|------|
| <b>5.0</b> | $A_0 - 40$ | 3438 | 1.00 | 3416 |
| Blank      | Avg.       | 22   | 6.88 |      |

---



**Table S5. Raw Data to Accompany Figure 2(b).  $^{154}\text{Eu}^{3+}$  Distribution ( $D$ )-values,  $f(\text{HNO}_3(\text{aq}))$  with Initial Concentration in Kerosene/Exxal (50v/50v) of 25 mM**

| [HNO <sub>3</sub> ]<br>(M) | Sample ID           | CPM  | Error (%) | Net CPM | Recovery (%) | $D_{Eu}$<br>(org./aq.) | $D_{Eu}$<br>Avg. |
|----------------------------|---------------------|------|-----------|---------|--------------|------------------------|------------------|
| <b>0.25</b>                | org. - 1            | 179  | 2.36      | 31      | 103.1        | 0.0077                 | 0.0076           |
|                            | org. - 2            | 178  | 2.37      | 30      | 102.3        | 0.0075                 |                  |
|                            | aq. - 3             | 4208 | 1.00      | 4060    |              |                        |                  |
|                            | aq. - 4             | 4178 | 1.00      | 4030    |              |                        |                  |
| <b>0.5</b>                 | org. - 5            | 194  | 2.27      | 46      | 102.4        | 0.0122                 | 0.0139           |
|                            | org. - 6            | 208  | 2.19      | 60      | 104.0        | 0.0156                 |                  |
|                            | aq. - 7             | 3955 | 1.00      | 3807    |              |                        |                  |
|                            | aq. - 8             | 4001 | 1.00      | 3853    |              |                        |                  |
| <b>0.75</b>                | org. - 9            | 277  | 1.90      | 129     | 101.1        | 0.0253                 | 0.0253           |
|                            | org. -10            | 276  | 1.90      | 128     | 100.4        | 0.0253                 |                  |
|                            | aq. - 11            | 5251 | 1.00      | 5103    |              |                        |                  |
|                            | aq. - 12            | 5213 | 0.99      | 5065    |              |                        |                  |
| <b>1.0</b>                 | org.- 13            | 332  | 1.74      | 184     | 100.5        | 0.0319                 | 0.0326           |
|                            | org.- 14            | 341  | 1.71      | 193     | 100.8        | 0.0334                 |                  |
|                            | aq. - 15            | 5927 | 0.99      | 5779    |              |                        |                  |
|                            | aq. - 16            | 5938 | 0.99      | 5790    |              |                        |                  |
| <b>2.0</b>                 | org. -17            | 351  | 1.69      | 203     | 100.7        | 0.0645                 | 0.0660           |
|                            | org. -18            | 363  | 1.66      | 215     | 102.2        | 0.0675                 |                  |
|                            | aq. - 19            | 3298 | 1.00      | 3150    |              |                        |                  |
|                            | aq. - 20            | 3335 | 1.00      | 3187    |              |                        |                  |
| <b>3.0</b>                 | org. -21            | 458  | 1.48      | 310     | 101.2        | 0.0848                 | 0.0885           |
|                            | org.-22             | 482  | 1.44      | 334     | 100.8        | 0.0923                 |                  |
|                            | aq. - 23            | 3808 | 1.00      | 3660    |              |                        |                  |
|                            | aq. - 24            | 3770 | 1.00      | 3622    |              |                        |                  |
| <b>4.0</b>                 | org. -25            | 381  | 1.62      | 233     | 105.9        | 0.0624                 | 0.0618           |
|                            | org.- 26            | 371  | 1.64      | 223     | 103.1        | 0.0613                 |                  |
|                            | aq. - 27            | 3889 | 1.00      | 3741    |              |                        |                  |
|                            | aq. - 28            | 3793 | 1.00      | 3645    |              |                        |                  |
| <b>5.0</b>                 | org.- 29            | 413  | 1.56      | 265     | 102.0        | 0.0720                 | 0.0724           |
|                            | org.- 30            | 418  | 1.55      | 270     | 103.0        | 0.0727                 |                  |
|                            | aq. - 31            | 3832 | 1.00      | 3684    |              |                        |                  |
|                            | aq. - 32            | 3863 | 1.00      | 3715    |              |                        |                  |
| <b>0.25</b>                | A <sub>0</sub> - 33 | 4118 | 1.00      | 3970    |              |                        |                  |
| <b>0.50</b>                | A <sub>0</sub> - 34 | 3911 | 1.00      | 3763    |              |                        |                  |
| <b>0.75</b>                | A <sub>0</sub> - 35 | 5321 | 1.00      | 5173    |              |                        |                  |
| <b>1.0</b>                 | A <sub>0</sub> - 36 | 6083 | 1.00      | 5935    |              |                        |                  |
| <b>2.0</b>                 | A <sub>0</sub> - 37 | 3477 | 1.00      | 3329    |              |                        |                  |
| <b>3.0</b>                 | A <sub>0</sub> - 38 | 4072 | 1.00      | 3924    |              |                        |                  |
| <b>4.0</b>                 | A <sub>0</sub> - 39 | 3901 | 1.00      | 3753    |              |                        |                  |

|              |                     |      |      |      |
|--------------|---------------------|------|------|------|
| <b>5.0</b>   | A <sub>0</sub> - 40 | 4018 | 1.00 | 3870 |
| <b>Blank</b> | <b>Avg.</b>         | 148  | 2.60 |      |

---

**Table S6. Summary  $D_M$  for Tables S4 and S5**

| <b>[HNO<sub>3</sub>]<br/>(M)</b> | <b><math>D_{Am}</math><br/>Avg.</b> | <b><math>D_{Am}</math><br/>Uncertainty<br/>(2<math>\sigma</math>)</b> | <b><math>D_{Eu}</math><br/>Avg.</b> | <b><math>D_{Eu}</math><br/>Uncertainty<br/>(2<math>\sigma</math>)</b> | <b><math>SF</math> (Avg.)<br/>(<math>D_{Am} / D_{Eu}</math>)</b> | <b><math>SF</math><br/>Uncertainty<br/>(2<math>\sigma</math>)</b> |
|----------------------------------|-------------------------------------|-----------------------------------------------------------------------|-------------------------------------|-----------------------------------------------------------------------|------------------------------------------------------------------|-------------------------------------------------------------------|
| <b>0.25</b>                      | 0.4503                              | 0.009                                                                 | 0.0076                              | 0.002                                                                 | 59.2                                                             | 15.6                                                              |
| <b>0.50</b>                      | 0.9431                              | 0.019                                                                 | 0.0139                              | 0.002                                                                 | 67.8                                                             | 10.8                                                              |
| <b>0.75</b>                      | 1.850                               | 0.038                                                                 | 0.0253                              | 0.002                                                                 | 73.1                                                             | 5.5                                                               |
| <b>1.0</b>                       | 2.695                               | 0.055                                                                 | 0.0326                              | 0.002                                                                 | 82.6                                                             | 4.8                                                               |
| <b>2.0</b>                       | 10.25                               | 0.316                                                                 | 0.0660                              | 0.003                                                                 | 155                                                              | 9.2                                                               |
| <b>3.0</b>                       | 13.45                               | 0.444                                                                 | 0.0885                              | 0.003                                                                 | 152                                                              | 7.6                                                               |
| <b>4.0</b>                       | 9.006                               | 0.267                                                                 | 0.0618                              | 0.003                                                                 | 146                                                              | 8.1                                                               |
| <b>5.0</b>                       | 9.699                               | 0.295                                                                 | 0.0724                              | 0.003                                                                 | 134                                                              | 7.0                                                               |

**Table S7. Raw Data to Accompany Figure 2(c). Distribution of  $^{241}\text{Am}^{3+}$  as a Function of Complexant Concentration in Kerosene/Exxal (50v/50v) Log-Log plot**

| [Ligand]<br>(mM) | Sample<br>ID        | CPM    | Error<br>(%) | Net<br>CPM | Recovery<br>(%) | $D_{Am}$<br>(org./aq.) | $D_{Am}$<br>Avg. |
|------------------|---------------------|--------|--------------|------------|-----------------|------------------------|------------------|
| <b>6.25</b>      | org. - 1            | 702    | 1.19         | 681        | 101.3           | 0.2378                 | 0.2424           |
|                  | org. - 2            | 741    | 1.16         | 720        | 103.9           | 0.2470                 |                  |
|                  | aq. - 3             | 2885   | 1.00         | 2864       |                 |                        |                  |
|                  | aq. - 4             | 2936   | 1.00         | 2915       |                 |                        |                  |
| <b>12.5</b>      | org. - 5            | 2102   | 1.00         | 2081       | 97.5            | 1.565                  | 1.593            |
|                  | org. - 6            | 2165   | 1.00         | 2144       | 99.1            | 1.621                  |                  |
|                  | aq. - 7             | 1351   | 1.00         | 1330       |                 |                        |                  |
|                  | aq. - 8             | 1344   | 1.00         | 1323       |                 |                        |                  |
| <b>25.0</b>      | org. - 9            | 2992   | 1.00         | 2971       | 94.4            | 8.922                  | 9.276            |
|                  | org. -10            | 3093   | 1.00         | 3072       | 96.9            | 9.630                  |                  |
|                  | aq. -11             | 354    | 1.68         | 333        |                 |                        |                  |
|                  | aq. -12             | 340    | 1.71         | 319        |                 |                        |                  |
| <b>37.5</b>      | org. -13            | 3138   | 1.00         | 3117       | 92.9            | 23.26                  | 24.06            |
|                  | org. -14            | 3327   | 1.00         | 3306       | 98.3            | 24.86                  |                  |
|                  | aq. - 15            | 155    | 2.54         | 134        |                 |                        |                  |
|                  | aq. - 16            | 154    | 2.55         | 133        |                 |                        |                  |
| <b>50.0</b>      | org. -17            | 3222   | 1.00         | 3201       | 93.4            | 48.50                  | 47.27            |
|                  | org. -18            | 3336   | 1.00         | 3315       | 96.8            | 46.04                  |                  |
|                  | aq. -19             | 87     | 3.40         | 66         |                 |                        |                  |
|                  | aq. - 20            | 93     | 3.28         | 72         |                 |                        |                  |
| <b>62.5</b>      | org. -21            | 3300   | 1.00         | 3279       | 95.0            | 71.28                  | 81.64            |
|                  | org.-22             | 3425   | 1.00         | 3404       | 98.3            | 92.00                  |                  |
|                  | aq. - 23            | 67     | 3.87         | 46         |                 |                        |                  |
|                  | aq. - 24            | 58     | 4.16         | 37         |                 |                        |                  |
| <b>75.0</b>      | org. -25            | 3342   | 1.00         | 3321       | 95.8            | 110.7                  | 110.9            |
|                  | org. -26            | 3354   | 1.00         | 3333       | 96.1            | 111.1                  |                  |
|                  | aq. - 27            | 51     | 4.45         | 30         |                 |                        |                  |
|                  | aq. - 28            | 51     | 4.43         | 30         |                 |                        |                  |
| A <sub>0</sub>   | A <sub>0</sub> - 29 | 3540   | 1.00         | 3519       |                 |                        |                  |
| A <sub>0</sub>   | A <sub>0</sub> - 30 | 3501   | 1.00         | 3480       |                 |                        |                  |
| A <sub>0</sub>   | Avg.                | 3520.5 | 1.00         | 3499.5     |                 |                        |                  |
| Blank            | Avg.                | 21     | 6.84         |            |                 |                        |                  |

**Table S8. Raw Data to Accompany Figure 2(c). Distribution of  $^{154}\text{Eu}^{3+}$  as a Function of Complexant Concentration in Kerosene/Exxal (50v/50v) Log-Log plot**

| [Ligand]<br>(mM) | Sample<br>ID        | CPM    | Error<br>(%) | Net<br>CPM      | Recovery<br>(%) | $D_{Eu}$<br>(org./aq.) | $D_{Eu}$<br>Avg. |
|------------------|---------------------|--------|--------------|-----------------|-----------------|------------------------|------------------|
| 6.25             | org. - 1            | 147    | 2.60         | -3 <sup>a</sup> | 102.6           | -0.0009                | -0.0001          |
|                  | org. - 2            | 152    | 2.57         | 2 <sup>b</sup>  | 103.0           | 0.0006                 |                  |
|                  | aq. - 3             | 3657   | 1.00         | 3507            |                 |                        |                  |
|                  | aq. - 4             | 3665   | 1.00         | 3515            |                 |                        |                  |
| 12.5             | org. - 5            | 198    | 2.25         | 48              | 103.3           | 0.0138                 | 0.0125           |
|                  | org. - 6            | 189    | 2.30         | 39              | 103.3           | 0.0112                 |                  |
|                  | aq. - 7             | 3629   | 1.00         | 3479            |                 |                        |                  |
|                  | aq. - 8             | 3639   | 1.00         | 3489            |                 |                        |                  |
| 25.0             | org. - 9            | 382    | 1.62         | 232             | 101.9           | 0.0714                 | 0.0719           |
|                  | org. -10            | 389    | 1.60         | 239             | 103.7           | 0.0724                 |                  |
|                  | aq. - 11            | 3399   | 1.00         | 3249            |                 |                        |                  |
|                  | aq. - 12            | 3452   | 1.00         | 3302            |                 |                        |                  |
| 37.5             | org. -13            | 712    | 1.19         | 562             | 102.0           | 0.1924                 | 0.1899           |
|                  | org. -14            | 705    | 1.19         | 555             | 103.0           | 0.1873                 |                  |
|                  | aq. -15             | 3071   | 1.00         | 2921            |                 |                        |                  |
|                  | aq. -16             | 3113   | 1.00         | 2963            |                 |                        |                  |
| 50.0             | org. -17            | 1072   | 1.00         | 922             | 100.6           | 0.3666                 | 0.3680           |
|                  | org. -18            | 1084   | 1.00         | 934             | 101.4           | 0.3693                 |                  |
|                  | aq. - 19            | 2665   | 1.00         | 2515            |                 |                        |                  |
|                  | aq. - 20            | 2679   | 1.00         | 2529            |                 |                        |                  |
| 62.5             | org. -21            | 1441   | 1.00         | 1291            | 99.1            | 0.6168                 | 0.6307           |
|                  | org.-22             | 1485   | 1.00         | 1335            | 99.7            | 0.6446                 |                  |
|                  | aq. - 23            | 2243   | 1.00         | 2093            |                 |                        |                  |
|                  | aq. - 24            | 2221   | 1.00         | 2071            |                 |                        |                  |
| 75.0             | org. -25            | 1785   | 1.00         | 1635            | 98.8            | 0.9407                 | 0.9457           |
|                  | org. -26            | 1806   | 1.00         | 1656            | 99.5            | 0.9506                 |                  |
|                  | aq. - 27            | 1888   | 1.00         | 1738            |                 |                        |                  |
|                  | aq. - 28            | 1892   | 1.00         | 1742            |                 |                        |                  |
| A <sub>0</sub>   | A <sub>0</sub> - 29 | 3408   | 1.00         | 3257.5          |                 |                        |                  |
| A <sub>0</sub>   | A <sub>0</sub> - 30 | 3425   | 1.00         | 3274.5          |                 |                        |                  |
| A <sub>0</sub>   | Avg.                | 3416.5 | 1.00         | 3266            |                 |                        |                  |
| Blank            | Avg.                | 150.5  | 2.58         |                 |                 |                        |                  |

<sup>a,b</sup>Net CPM is below the critical limit ( $L_C$ ) and therefore, reported as not detected,  $L_C = 29$  (95% confidence level). Upper limits ( $L_U$ ) at the 95% confidence level: <sup>a</sup> $L_U = \text{NA}$ , <sup>b</sup> $L_U = 31$ .

**Table S9. Summary  $D_M$  for Tables S7 and S8**

| <b>[Ligand]<br/>(mM)</b> | <b><math>D_{Am}</math><br/>Avg.</b> | <b><math>D_{Am}</math><br/>Uncertainty<br/>(<math>2\sigma</math>)</b> | <b><math>D_{Eu}</math><br/>Avg.</b> | <b><math>D_{Eu}</math><br/>Uncertainty<br/>(<math>2\sigma</math>)</b> | <b><math>SF</math> (Avg.)<br/>(<math>D_{Am} / D_{Eu}</math>)</b> | <b><math>SF</math><br/>Uncertainty<br/>(<math>2\sigma</math>)</b> |
|--------------------------|-------------------------------------|-----------------------------------------------------------------------|-------------------------------------|-----------------------------------------------------------------------|------------------------------------------------------------------|-------------------------------------------------------------------|
| <b>6.25</b>              | 0.2424                              | 0.005                                                                 | --                                  | --                                                                    | --                                                               | 25                                                                |
| <b>12.5</b>              | 1.593                               | 0.032                                                                 | 0.0125                              | 0.002                                                                 | 128                                                              | 7.1                                                               |
| <b>25.0</b>              | 9.276                               | 0.278                                                                 | 0.0719                              | 0.003                                                                 | 129                                                              | 6.9                                                               |
| <b>37.5</b>              | 24.06                               | 1.12                                                                  | 0.1899                              | 0.005                                                                 | 127                                                              | 9.5                                                               |
| <b>50.0</b>              | 47.27                               | 3.31                                                                  | 0.3680                              | 0.009                                                                 | 128                                                              | 14                                                                |
| <b>62.5</b>              | 81.64                               | 8.44                                                                  | 0.6307                              | 0.014                                                                 | 129                                                              | 15                                                                |
| <b>75.0</b>              | 110.9                               | 14.1                                                                  | 0.9457                              | 0.021                                                                 | 117                                                              | 25                                                                |
